# Supplementary material for: Determinants of the VP1/2A junction cleavage by the 3C protease in foot-and-mouth disease virus-infected cells
Source: PubMed Central journal article supplement (PMC5797948; doi:10.1099/jgv.0.000664), 2017-04-01
Supplement: jgv-98-385-s001.pdf [file jgv-98-385-s001.pdf]

**Supplementary Table S1. Primers used for plasmid construction and cDNA synthesis**

| Primer name                  | Sequence (5'-3')                                       |
|------------------------------|--------------------------------------------------------|
| FMDVA_ <i>Nhe</i> IVP4VP2_Fw | CGCTCT <u>GCTAGCC</u> GATAAGAAGACCGAGGAGACCA           |
| FMDVA_ <i>Apa</i> I2A2B_Re   | CTACTAG <u>GGCCC</u> GGGGTTGGACTCAACGTCTCCTG           |
| FMDVA_2AL2P_Fw               | CAACTT <b>C</b> CAAACTTCGATTTGCTCAAGTTGGCAGGAGAC       |
| FMDVA_2AL2P_Re               | GAAGTT <b>TGG</b> AAGTTGTTTTGCAGGTGCAATGATCTTCTG       |
| FMDVA_VP1K210E_2AL2P_Re      | GAAGTT <b>TGG</b> AAGTTGTTCTGCAGGTGCAATGATCTTCTG       |
| 13-N PN2                     | AAGTTTTACCGTCGTTCCCGACGTAAAAGGGAGGTAACCAC<br>AAGCTTGAA |
| 10-P PN 30                   | TCTGGACAGCACCTTTGTCTG                                  |
| 8-A PN 200                   | GAGACGTTGAGTCCAACCC                                    |
| 13-N PN 3                    | CCGTAGGAGTGAAAATCCCGAAAGGGTTTTTCCCGCTTCCTT<br>AATCCAAA |
| O1PN20                       | GACATGTCCTCCTGCATCTG                                   |
| 13LPN21                      | GCACCTGCAN <b>N</b> NCAACTTTTGAAC                      |

<sup>a</sup> Underlined sequences represent restriction enzyme sites *Nhe*I and *Apa*I. Nucleotide changes producing amino acids substitutions are shown in boldface italics.
